# Supplementary material for: CYK-4 regulates Rac, but not Rho, during cytokinesis
Source: PubMed Central journal article supplement — Mol Biol Cell. 2017 May 1;28(9):1258–70. doi: 10.1091/mbc.E17-01-0020 (PMC5415020; doi:10.1091/mbc.e17-01-0020), 2017-05-01
Supplement: supp_E17-01-0020v1_CombinedSupMats.pdf [file supp_E17-01-0020v1_CombinedSupMats.pdf]

# Supplemental Materials

*Molecular Biology of the Cell*

Zhuravlev et al.

## Supplemental Information: Zhuravlev *et al.* 2017

### Title

CYK-4 regulates Rac, but not Rho, during cytokinesis

### Authors

Yelena Zhuravlev<sup>1</sup>, Sophia M. Hirsch<sup>1</sup>, Shawn N. Jordan<sup>2</sup>, Julien Dumont<sup>3</sup>, Mimi Shirasu-Hiza<sup>1</sup>, and Julie C. Canman<sup>2\*</sup>

### Affiliations

<sup>1</sup>Columbia University Medical Center, Department of Genetics and Development, New York, NY 10032

<sup>2</sup>Columbia University Medical Center, Department of Pathology and Cell Biology, New York, NY 10032

<sup>3</sup>Institut Jacques Monod, CNRS, UMR 7592, Université Paris Diderot, Sorbonne Paris Cité F-75205 Paris, France

\*Corresponding author: Julie C. Canman, 630 W. 168<sup>th</sup> St., New York, NY 10032, (212) 305-5017, [jcc2210@cumc.columbia.edu](mailto:jcc2210@cumc.columbia.edu)

### Running Head

CYK-4 and Rac in cytokinesis

### Supplemental Information Table of Contents:

Supplemental Figure Legends

Figure S1: Kinetic analysis and 2-cell analysis of cytokinesis in *cyk-4(ts)* embryos

Figure S2: Genetic model of Rho family GTPase regulation during cytokinesis

Table S1: *C. elegans* strains used in this manuscript

Table S2: RNAi clones and primers used in this manuscript

Table S3: Statistical analysis results (Excel file, separate download)

## Supplementary Figure Legends

### **Figure S1: *cyk-4(ts)* mutant embryos take longer to form a double membrane and fail in cytokinesis at the 2-cell stage via a *Rac*-dependent mechanism**

A) Time-lapse montage of the division plane region over time during cytokinesis in control and *cyk-4(ts)* mutant 1-cell embryos with and without *Rac(RNAi)*. The plasma membrane is labeled with GFP::PH. B) Analysis of the time from anaphase onset to double membrane formation in embryos from the genotypes shown. All of the controls but only a few *cyk-4(ts)* mutant embryos have formed a double membrane at 150 sec post-AO due to the slower rate of contractile ring constriction in *cyk-4(ts)* mutants (e.g. Figure 1A and C). Error bars represent the SD; p-values were obtained by an unpaired, two-tailed t-test (Table S3). C) Schematic of the 2-cell *C. elegans* embryo indicating the anterior AB and posterior P1 cells; and bar graph showing cytokinesis completion/failure rates of AB and P1 cells in *cyk-4(ts)* mutant 2-cell embryos with or without *Rac(G60R)* at restrictive temperature. The number of embryos per genotype is indicated on each individual bar; p-values were obtained by both Fisher's and Barnard's exact tests (Table S3). AO=anaphase onset. n.s.= $p>0.05$ ; \*= $p<0.05$ ; \*\*= $p<0.01$ ; \*\*\*= $p<0.001$ ; \*\*\*\*= $p<0.0001$ . Scale bars: yellow=60 sec, white=10  $\mu\text{m}$ .

Figure S1: Zhuravlev et al. (2017)

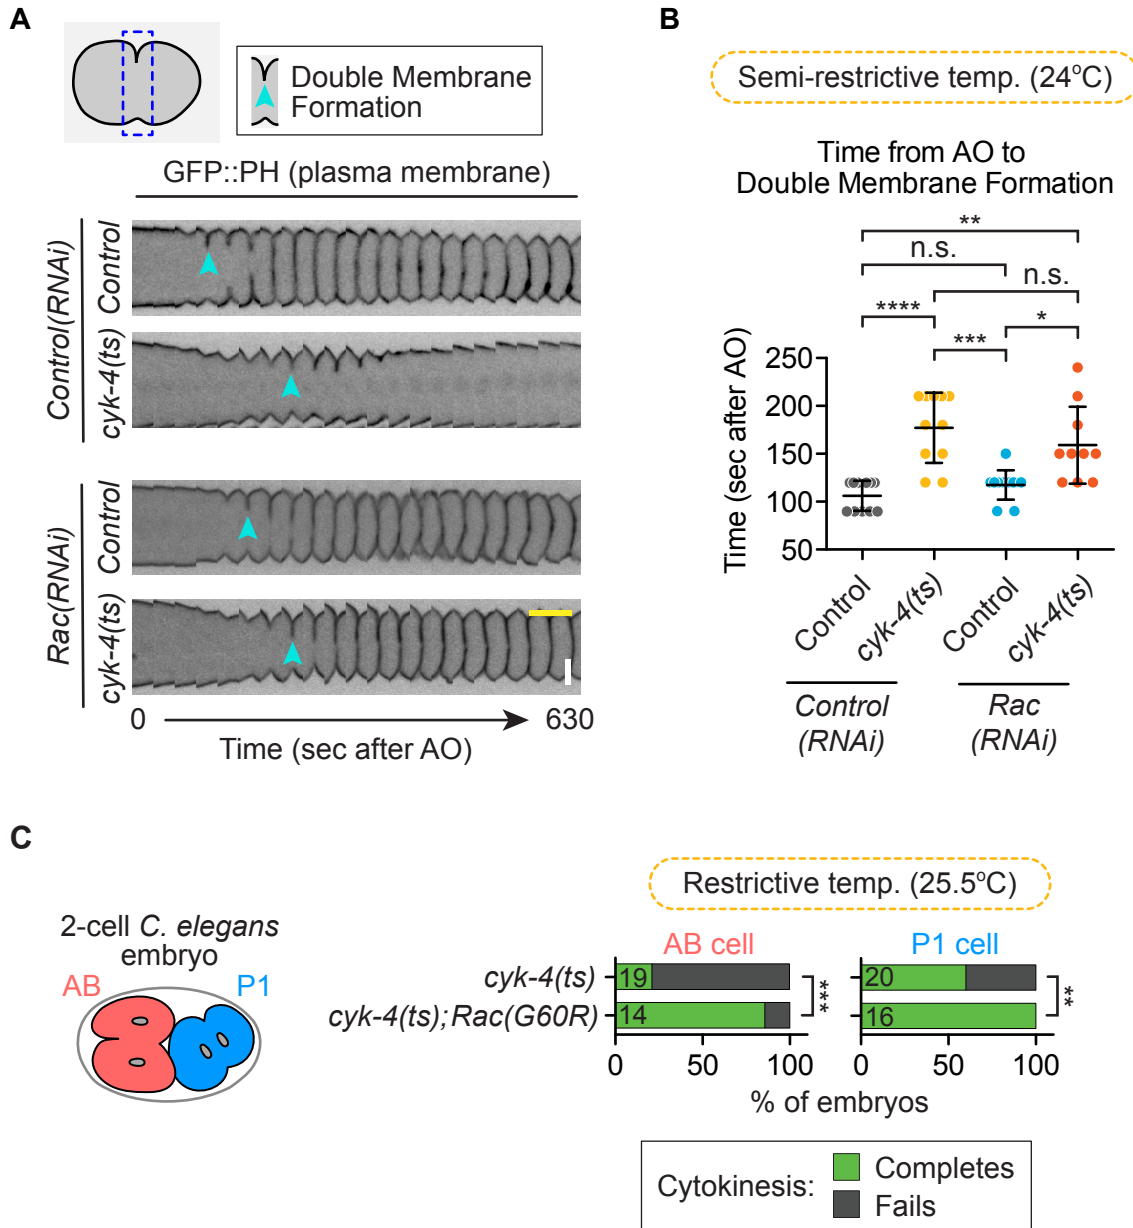

**Figure S2: Genetic model for Rho family GTPase signaling during cytokinesis**

Revised genetic model for the molecular regulation of Rho family small GTPases during cytokinesis. Note: We cannot rule out a role for ECT-2 in regulating Rac and/or CYK-4 activity. We also cannot rule out a role for ECT-2 and/or CYK-4 in regulating Cdc42 activity.

Figure S2: Zhuravlev et al. (2017)

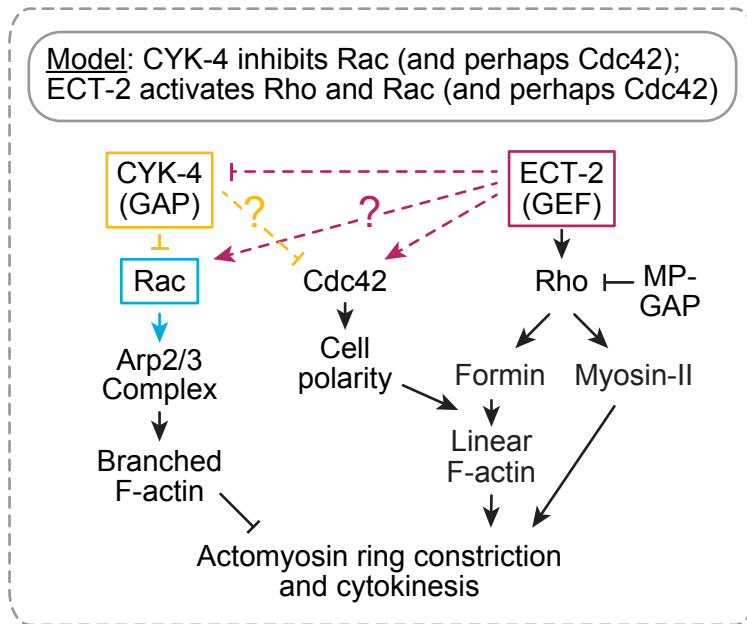

## **Supplementary Table Legends**

### **Table S1: *Strain names and genotypes***

List of all strain names and genotypes used in this study.

### **Table S2: *Feeding RNAi constructs***

Plasmid names, oligos for RNAi feeding constructs, and DNA templates with the Ahringer clone number and/or cloning vector information used in this study.

### **Table S3: *Statistical analysis.***

Matrix of all statistical analysis, p-values, and experimental numbers used throughout this study.

Table S1: Zhuravlev et al. (2017)

## Strain Names and Genotypes

| Strain | Genotype                                                                                                                                                  |
|--------|-----------------------------------------------------------------------------------------------------------------------------------------------------------|
| N2     | <i>wild-type (ancestral)</i>                                                                                                                              |
| OD95   | <i>unc-119(ed3)* ltIs38[pAA1; pie-1::eGFP::PH(PLC1delta1) unc-119(+)]III; ltIs37[pAA64; pie-1::mCherry::his-58 unc-119(+)]IV</i>                          |
| JCC176 | <i>unc-119(ed3)* ltIs38[pAA1; pie-1::eGFP::PH(PLC1delta1) unc-119(+)]III; ced-10(n3246)IV</i>                                                             |
| OD239  | <i>cyk-4(or749ts) unc-119(ed3)* ltIs38[pAA1; pie-1::eGFP::PH(PLC1delta1) unc-119(+)]III; ltIs37[pAA64; pie-1::mCherry::his-58 unc-119(+)]IV</i>           |
| JCC146 | <i>cyk-1(or596ts) unc-119(ed3)* ltIs38[pAA1; pie-1::eGFP::PH(PLC1delta1) unc-119(+)]III; ltIs37[pAA64; pie-1::mCherry::his-58 unc-119(+)]IV</i>           |
| JCC177 | <i>cyk-1(or596ts) unc-119(ed3)* ltIs38[pAA1; pie-1::eGFP::PH(PLC1delta1) unc-119(+)]III; ced-10(n3246)IV</i>                                              |
| JCC192 | <i>nmy-2(ne3409ts) dpy-5**; unc-119(ed3)* ltIs38[pAA1; pie-1::eGFP::PH(PLC1delta1) unc-119(+)]III; ltIs37[pAA64; pie-1::mCherry::his-58 unc-119(+)]IV</i> |
| JCC203 | <i>nmy-2(ne3409ts), dpy-5**; unc-119(ed3)* ltIs38[pAA1; pie-1::eGFP::PH(PLC1delta1) unc-119(+)]III; ced-10(n3246)IV</i>                                   |
| JCC925 | <i>ect-2(ax751ts)II; unc-119(ed3)*, ltIs38 [pAA1; pie-1::eGFP::PH(PLC1delta1) unc-119(+)]III</i>                                                          |
| JH2754 | <i>ect-2(ax751ts)II</i>                                                                                                                                   |
| MG592  | <i>ect-2(ax751ts)II; ced-10(n1993)IV</i>                                                                                                                  |
| MT5013 | <i>ced-10(n1993)IV</i>                                                                                                                                    |
| JCC719 | <i>mgSi3[cb-unc-119(+)] eGFP:utrophin]II; unc-119(ed3)*III; ltIs37[pAA64; pie-1::mCherry::his-58 unc-119(+)]IV</i>                                        |
| JCC765 | <i>mgSi3[cb-unc-119(+)] eGFP:utrophin]II; unc-119(ed3)* cyk-4(or749ts)III; ltIs37[pAA64; pie-1::mCherry::his-58 unc-119(+)]IV</i>                         |
| JCC541 | <i>unc-119(ed3)*III; ltIs37 [pAA64; pie-1::mCherry::his-58; unc-119(+)]IV; zuls45[nmy-2::nmy-2::eGFP unc-119(+)]V</i>                                     |
| OD235  | <i>unc-119(ed3)* cyk-4(or749ts)III; zuls45[nmy-2::nmy-2::eGFP unc-119(+)]V.</i>                                                                           |
| JCC178 | <i>unc-119(ed3)* cyk-4(or749ts) ltIs38[pAA1; pie-1::eGFP::PH(PLC1delta1) unc-119(+)]III; ced-10(n3246)IV</i>                                              |
| BA17   | <i>fem-1(hc17)IV</i>                                                                                                                                      |
| OD227  | <i>cyk-4(or749ts)III</i>                                                                                                                                  |
| EU1303 | <i>cyk-4(or570ts)III</i>                                                                                                                                  |

\*The *unc-119(ed3)* mutation was present in the parental strains but has not been directly sequenced in these strains to determine if the *unc-119* gene is mutated.

\*\*The exact *dpy-5* allele is unknown but presumed to be *e61*, as published in (Carvalho et al. 2009. *Cell*. 137:936-37).



Table S2: Zhuravlev et al (2017)

**Feeding RNAi constructs**

| Plasmid | Gene(s)                     | Oligo 1 (5'-3')                                  | Oligo 2 (5'-3')                             | Template | Cloning vector          |
|---------|-----------------------------|--------------------------------------------------|---------------------------------------------|----------|-------------------------|
| pJC90   | <i>ced-10</i><br>(C09G12.8) | GCGCG <u>AAGCTT</u><br>TCAAATGTGTCGTCGTTGGT      | GCGCG <u>AAGCTT</u><br>GATCGCCTCATCGAAAATTG | N2 cDNA  | L4440<br>(empty vector) |
| pJC53   | <i>cdc-42</i> (R07G3.1)     | Acquired from Ahringer library (Clone # II-5P13) |                                             |          |                         |
